# Supplementary material for: Interpretable-machine-learning-guided discovery of dominant intrinsic factors of sensitivity of high explosives
Source: Royal Society of Chemistry journal article supplement (doi:10.1039/d4ma00152d), 2024-01-01
Supplement: d4ma00152d1.pdf [file d4ma00152d1.pdf]

## Supporting Information for:

# Interpretable-machine-learning-guided discovery of dominant intrinsic factors of sensitivity of high explosives

Xianshuang Wang,<sup>ψ</sup> Yage He,<sup>§</sup> Xinyu Zhang,<sup>§</sup> Maoxin Hu,<sup>§</sup> Wanzhu Zhao,<sup>§</sup> Haohan Sun,<sup>§</sup> Xiaoning Yang,<sup>§</sup> Xiaodong Liu and <sup>§</sup> Ruibin Liu,<sup>§,\*</sup>

<sup>ψ</sup>School of Materials Science and Engineering, Beijing Institute of Technology, Beijing 100081, China.

<sup>§</sup>Key Lab of Nanophotonics & Ultrafine Optoelectronic Systems, and School of Physics, Beijing Institute of Technology, Beijing 100081, China.

### This PDF file includes:

Supplementary Figures from Figure S1 to S10 ..... S2

Supplementary Tables from Table S1 to S5 ..... S8

## Supplementary Figures

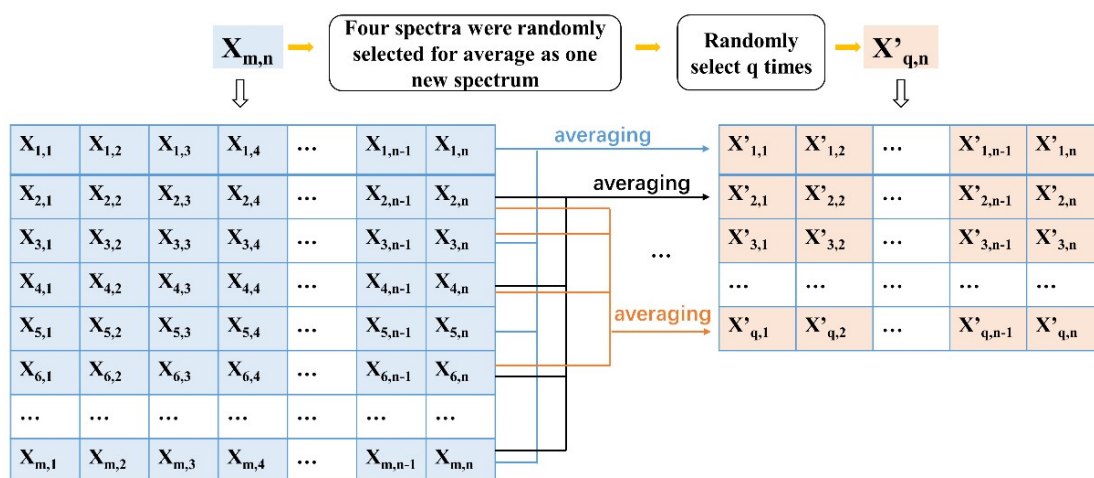

Figure S1. Random sampling and averaging strategy.

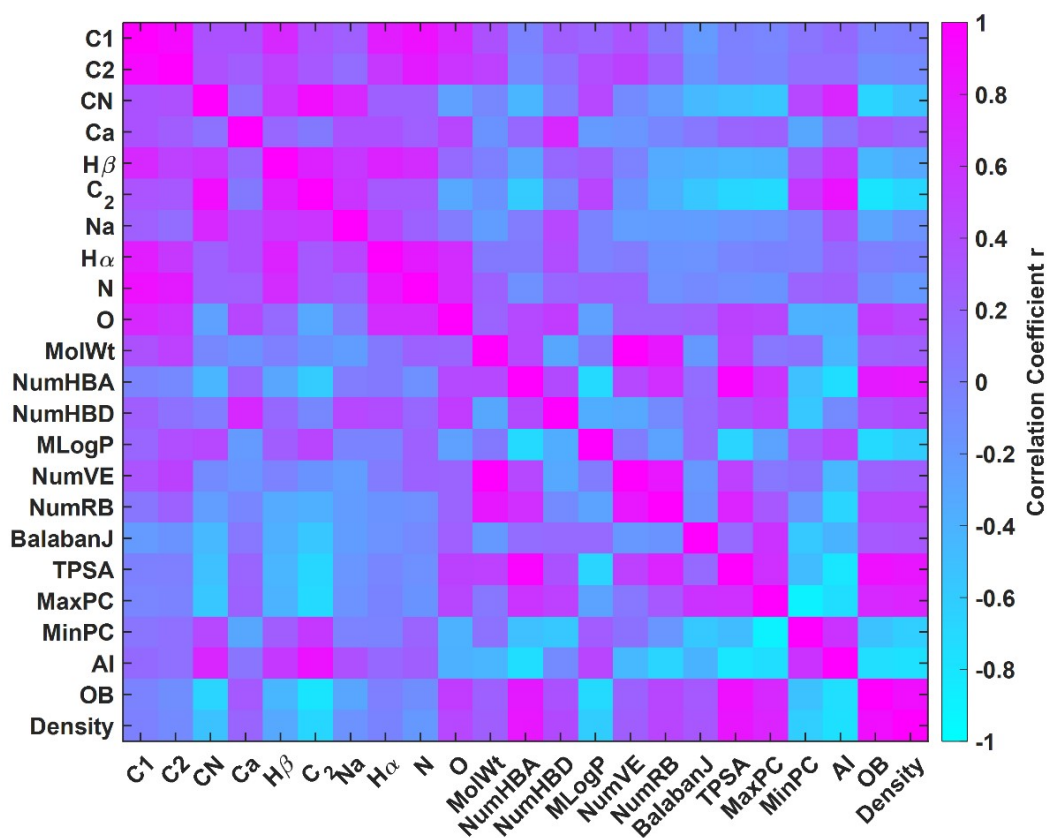

Figure S2. Spearman rank correlation matrices of features.

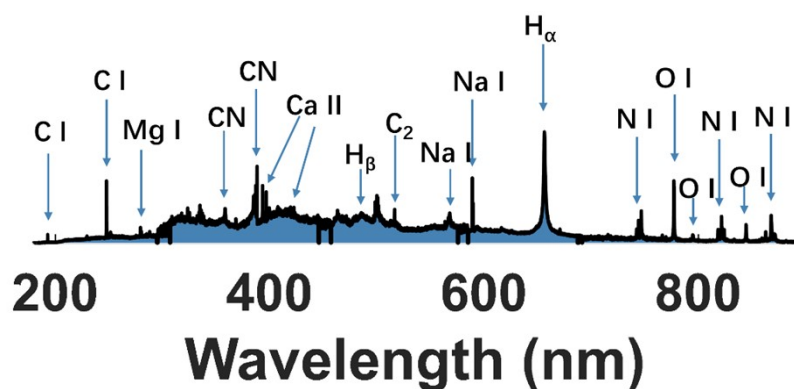

Figure S3. A representative LIPS spectrum of HEs with spectral lines recognition.

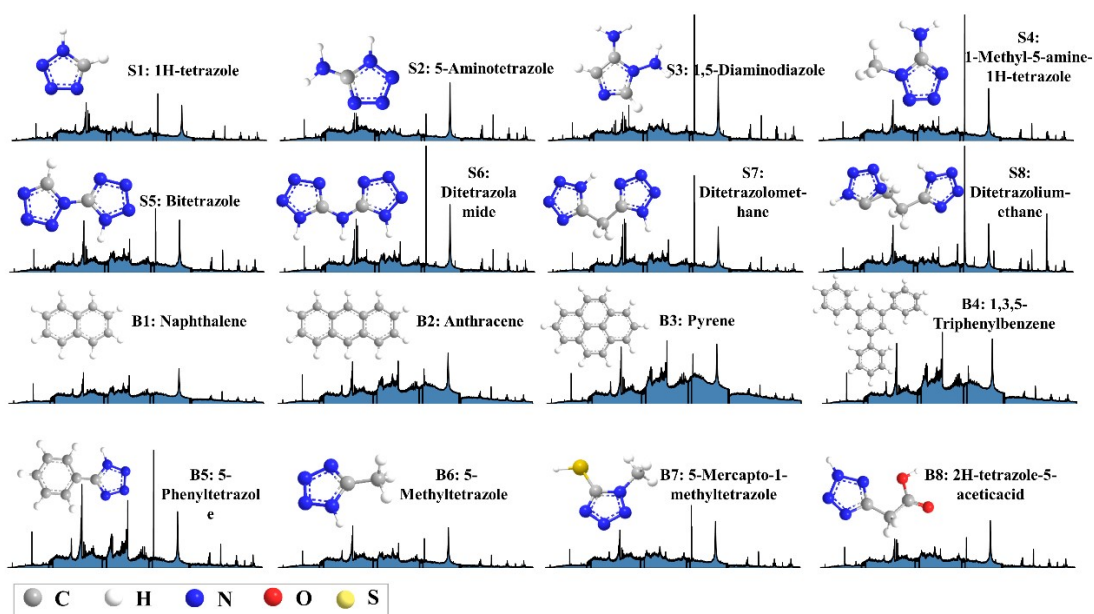

Figure S4. LIPS spectra and molecular structures of eight kinds of energetic tetrazole ring-based organic high-nitrogen compounds and eight kinds of benzene ring organics.

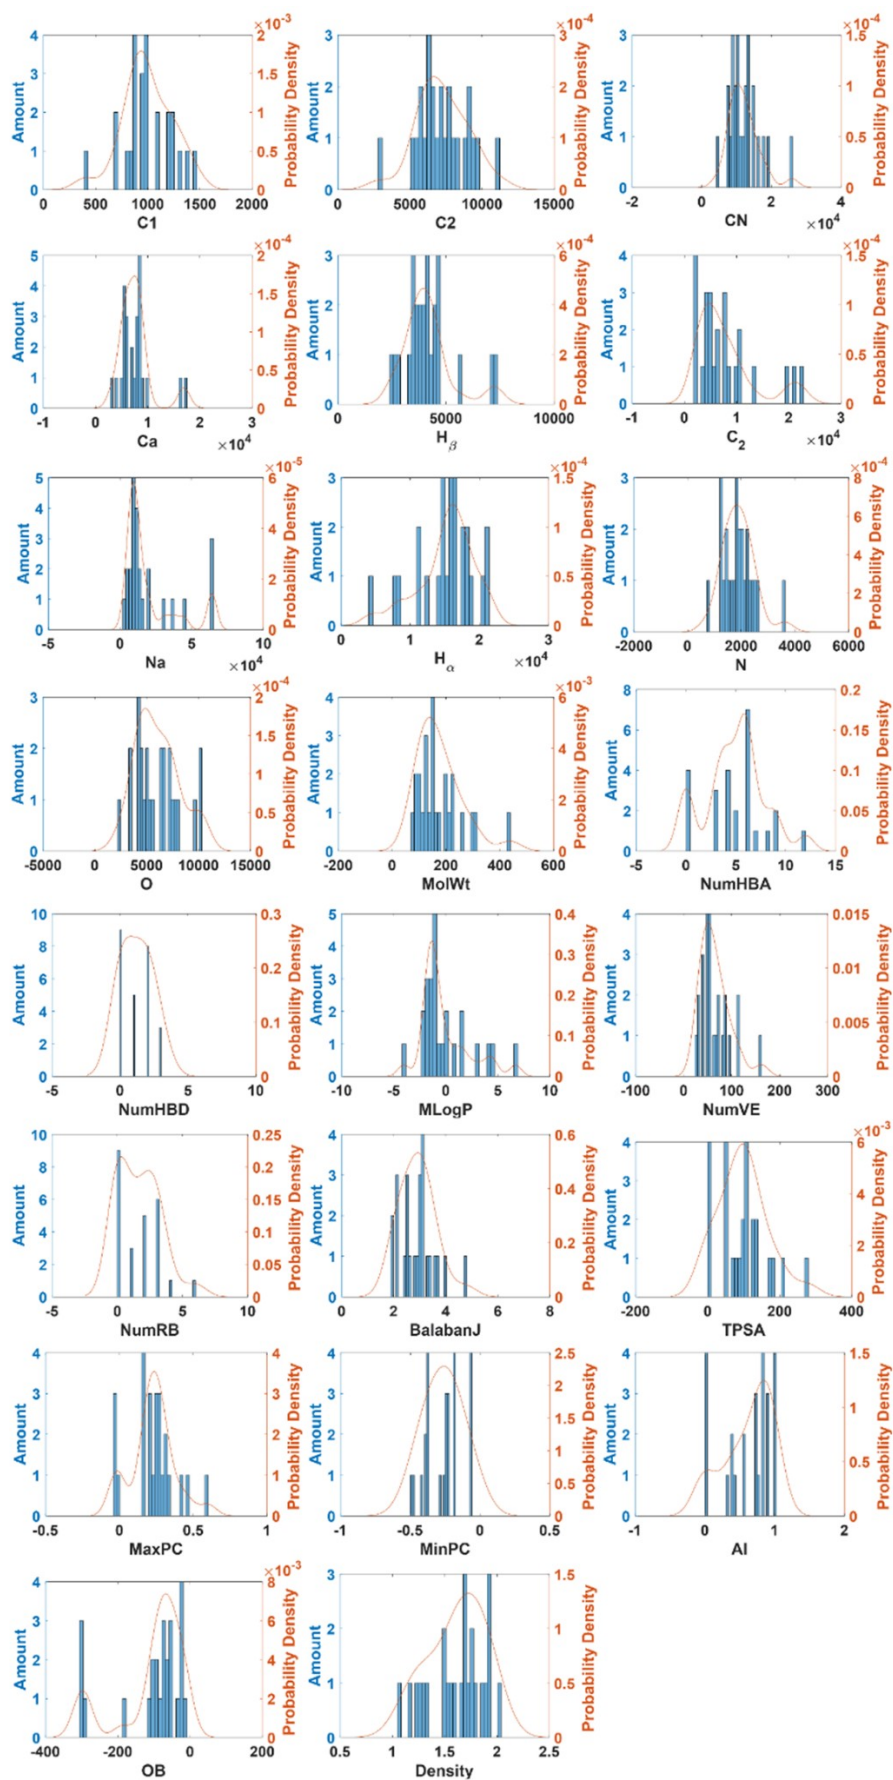

**Figure S5.** Histograms and probability density distribution of selected features of all data sets.

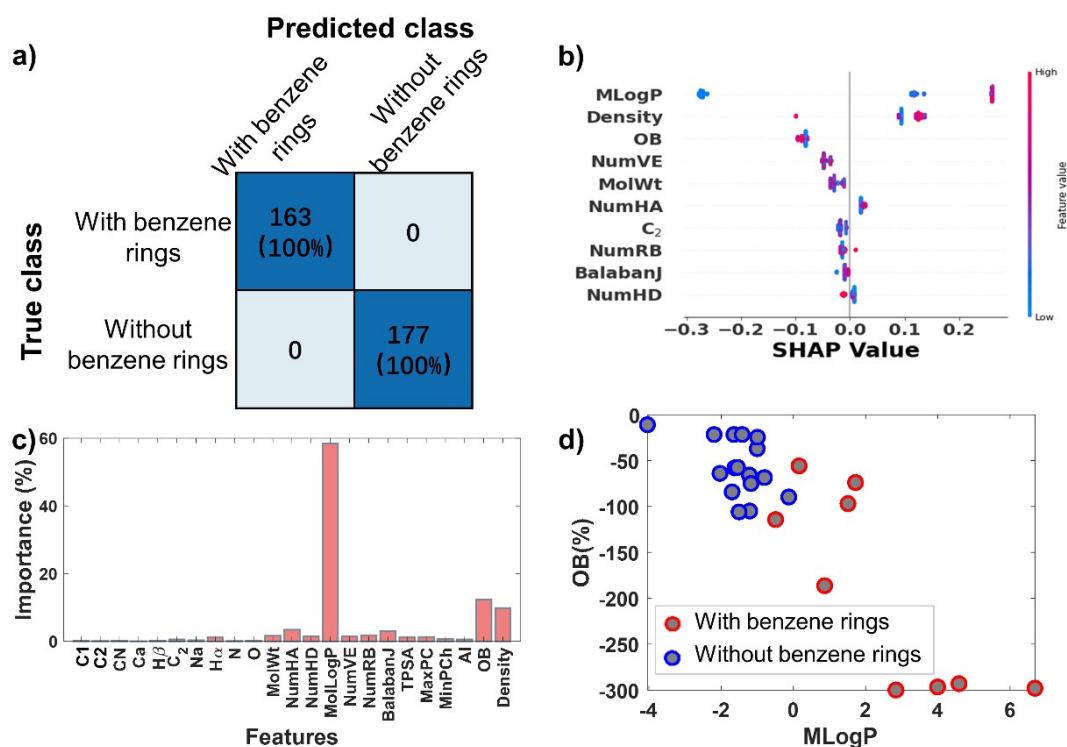

**Figure S6.** Feature importance analysis of classification model (with benzene rings VS without benzene rings). (a) Confusion matrix figures of prediction results. (b) SHAP analysis of the training data set samples and the RF model. (c) Feature importance directly educed from RF model. (d) Samples distribution in the custom operator feature space of MLogP and OB.

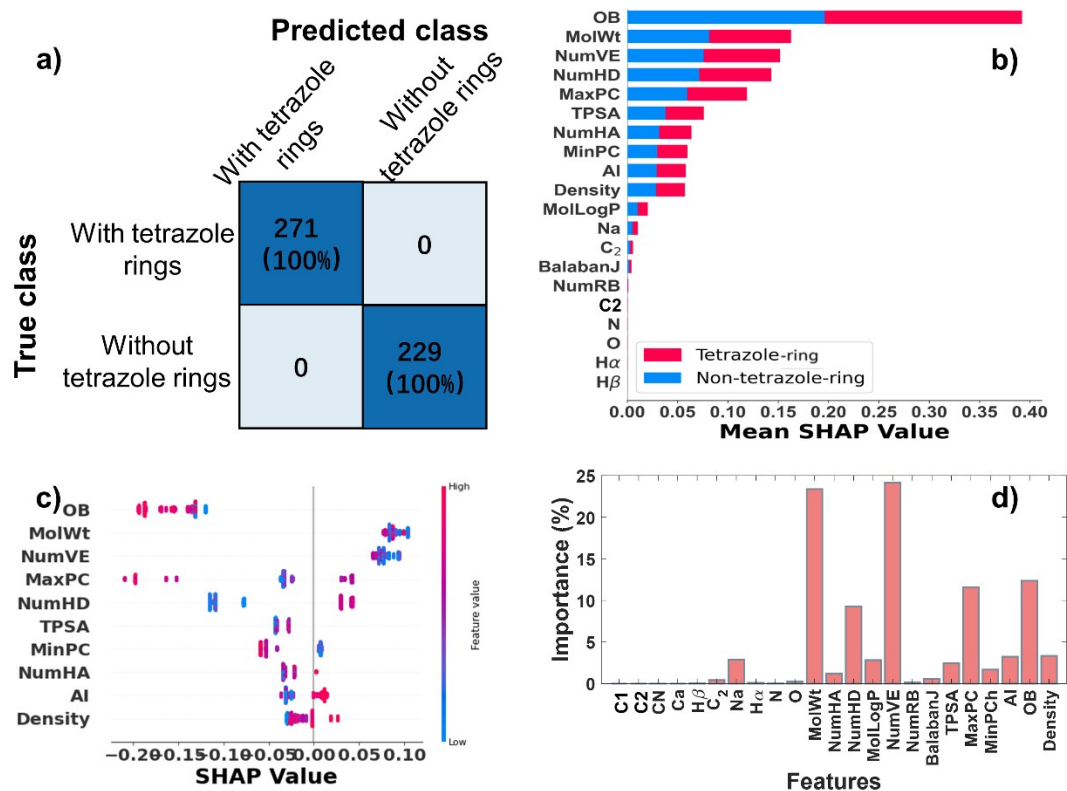

**Figure S7.** Feature importance analysis of classification model (with tetrazole rings VS without tetrazole rings). (a) Confusion matrix figures of prediction results. (b) Mean SHAP value analysis of the training data set samples and the RF model. (c) SHAP analysis of the training data set samples and the RF model. (d) Feature importance directly educed from RF model.

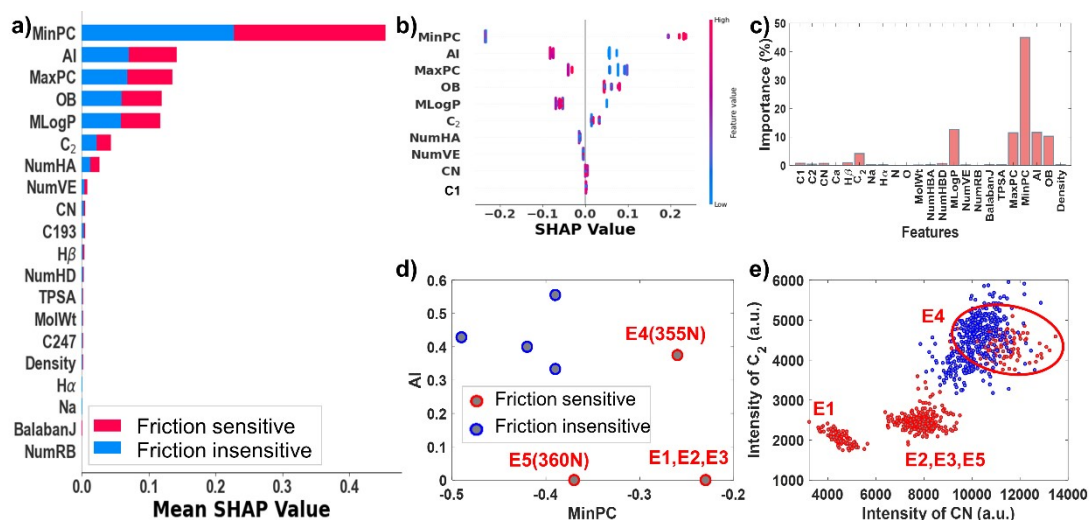

**Figure S8.** Feature importance analysis of friction sensitivity model. (a) Mean SHAP value analysis of the training data set samples and the RF model. (b) SHAP analysis of the training data set samples and the RF model. (c) Feature importance directly educed from RF model. (d) Samples distribution in the custom operator feature space of MinPC and AI. (e) Samples distribution in the spectral feature space of C<sub>2</sub> and CN.

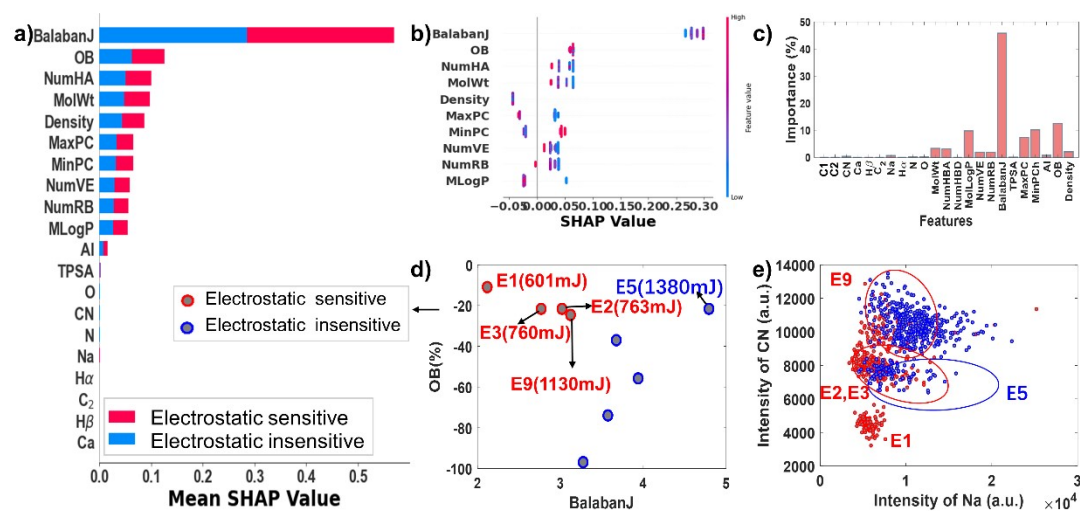

**Figure S9.** Feature importance analysis of electrostatic sensitivity model. (a) Mean SHAP value analysis of the training data set samples and the RF model. (b) SHAP analysis of the training data set samples and the RF model. (c) Feature importance directly educed from RF model. (d) Samples distribution in the custom operator feature space of BalabanJ and OB. (e) Samples distribution in the spectral feature space of Na and CN.



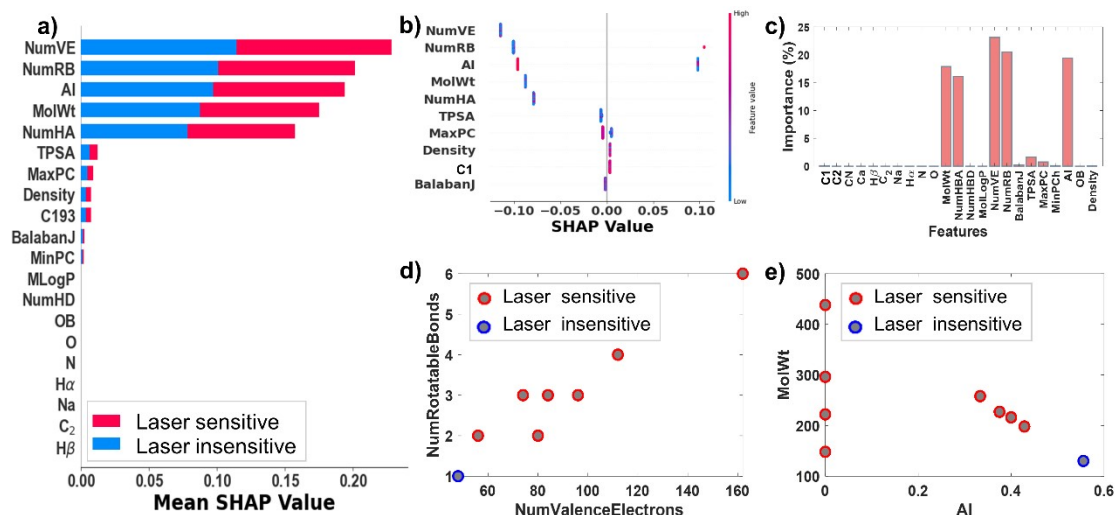

**Figure S10.** Feature importance analysis of laser sensitivity model. (a) Mean SHAP value analysis of the training data set samples and the RF model. (b) SHAP analysis of the training data set samples and the RF model. (c) Feature importance directly deduced from RF model. (d) Samples distribution in the custom operator feature space of NumVE and NumRB (e) Samples distribution in the custom operator feature space of AI and MolWt.

## Supplementary Tables

**Table S1. A list of organic ring compounds.**

| Sample | Chemical name                 | Sample | Chemical name                |
|--------|-------------------------------|--------|------------------------------|
| S1     | 1H-tetrazole                  | B1     | Naphthalene                  |
| S2     | 5-Aminotetrazole              | B2     | Anthracene                   |
| S3     | 1,5-Diaminodiazole            | B3     | Pyrene                       |
| S4     | 1-Methyl-5-amine-1H-tetrazole | B4     | 1,3,5-Triphenylbenzene       |
| S5     | Bitetrazole                   | B5     | 5-Phenyltetrazole            |
| S6     | Ditetrazolamide               | B6     | 5-Methyltetrazole            |
| S7     | Ditetrazolomethane            | B7     | 5-Mercapto-1-methyltetrazole |
| S8     | Ditetrazoliummethane          | B8     | 2H-tetrazole-5-aceticacid    |

**Table S2. Abbreviation and description for features.**

| Abbreviation   | Description                                                                             | Abbreviation   | Description                                               |
|----------------|-----------------------------------------------------------------------------------------|----------------|-----------------------------------------------------------|
| C1             | Spectral intensity of C atom at 193.1 nm                                                | C2             | Spectral intensity of C atom at 247.9 nm                  |
| CN             | Spectral intensity of CN molecule at 388.3 nm                                           | Ca             | Spectral intensity of Ca ion at 393.4 nm                  |
| H <sub>β</sub> | Spectral intensity of H atom at 486.1 nm                                                | C <sub>2</sub> | Spectral intensity of C <sub>2</sub> molecule at 516.5 nm |
| Na             | Spectral intensity of Na atom at 589.0 nm                                               | H <sub>α</sub> | Spectral intensity of H atom at 656.3 nm                  |
| N              | Spectral intensity of N atom at 742.4 nm                                                | O              | Spectral intensity of O atom at 777.4 nm                  |
| MolWt          | Molecular weight                                                                        | NumHBA         | Number of hydrogen bond acceptor                          |
| NumHBD         | Number of hydrogen bond donor                                                           | MLogP          | Multi-core oil-water partition coefficient                |
| NumVE          | Number of valence electrons                                                             | NumRB          | Number of rotatable bond                                  |
| BalabanJ       | A useful tool for expressing "topological shape" of molecules or of molecular fragments | TPSA           | Topological polar surface area                            |
| MaxPC          | Maximum value of partial charge                                                         | MinPC          | Minimum value of partial charge                           |
| AI             | Aromatic index                                                                          | OB             | Oxygen balance                                            |
| Density        | Crystal density                                                                         | -              | -                                                         |



**Table S3. Different types of features**

| Feature type                                            |                              | Feature Abbreviation                                                        |
|---------------------------------------------------------|------------------------------|-----------------------------------------------------------------------------|
| Spectral features by experiments                        | Atomic spectral features     | C1, C2, Ca, H <sub>α</sub> , Na, H <sub>β</sub> , N, O                      |
|                                                         | Molecular spectral features  | CN, C <sub>2</sub>                                                          |
| Atomic and molecular custom descriptors by calculation. | Atomic custom descriptors    | MaxPC, MinPC                                                                |
|                                                         | Molecular custom descriptors | MolWt, NumHBA, NumHBD, MLogP, NumVE, NumRB, BalabanJ, TPSA, AI, OB, Density |

**Table S4. Data set division of multiple sensitivities classification tasks.**

| Category name             | Classification standard                        | Samples                 | The number of final spectra of each sample |
|---------------------------|------------------------------------------------|-------------------------|--------------------------------------------|
| Impact sensitive          | Impact sensitivity $\leq$ 40 J                 | E1,E2,E3,E5,E7,E9       | 50                                         |
| Impact insensitive        | Impact sensitivity $>$ 40 J                    | E4,E6,E8                | 100                                        |
| Friction sensitive        | Friction sensitivity $\leq$ 360 N              | E1,E2,E3,E4,E5          | 100                                        |
| Friction insensitive      | Friction sensitivity $>$ 360 N                 | E6,E7,E8,E9             | 100                                        |
| Electrostatic sensitive   | Electrostatic sensitivity $\leq$ 1200 mJ       | E1,E2,E3,E9             | 100                                        |
| Electrostatic insensitive | Electrostatic sensitivity $>$ 1200 mJ          | E4,E5,E6,E7,E8          | 100                                        |
| Laser sensitive           | Laser sensitivity $\leq$ 70 J cm <sup>-2</sup> | E1,E2,E3,E4,E5,E6,E7,E8 | 50                                         |
| Laser insensitive         | Laser sensitivity $>$ 70 J cm <sup>-2</sup>    | E9                      | 400                                        |

**Table S5. Data set division of classification tasks for comparison.**

| Category name           | Classification standard                                   | Samples                                         | The number of final spectra of each sample |
|-------------------------|-----------------------------------------------------------|-------------------------------------------------|--------------------------------------------|
| with benzene rings      | Number of benzene rings in molecular structure $\geq$ 1   | E4,E6,E8,B1,B2,B3,B4,B5,B6                      | 100                                        |
| without benzene rings   | Number of benzene rings in molecular structure=0          | S1,S2,S3,S4,S5,S6,S7,S8,E1,E2,E3,E5,E7,E9,B7,B8 | 50                                         |
| with tetrazole rings    | Number of tetrazole rings in molecular structure $\geq$ 1 | S1,S2,S3,S4,S5,S6,S7,S8,B5,B6,B7,B8             | 100                                        |
| without tetrazole rings | Number of tetrazole rings in molecular structure=0        | E1,E2,E3,E4,E5,E6,E7,E8,E9,B1,B2,B3,B4          | 100                                        |
